# 1 **The evolution of multicellular complexity: the role of relatedness and** 2 **environmental constraints**

3

4 Fisher, RM<sup>1</sup>, Shik, JZ<sup>1,2</sup> & Boomsma, JJ<sup>1</sup>

5 <sup>1</sup>Section for Ecology and Evolution, Department of Biology, University of Copenhagen,  
6 Denmark

7 <sup>2</sup>Smithsonian Tropical Research Institute, Apartado 0843-03092, Balboa, Ancon, Republic  
8 of Panama

9

10 **Keywords:** major evolutionary transitions, multicellularity, scaling

11

## 12 **Abstract**

13

14 A major challenge in evolutionary biology has been to explain the variation in multicellularity  
15 across the many independently evolved multicellular lineages, from slime moulds to  
16 humans. Social evolution theory has highlighted the key role of relatedness in determining  
17 multicellular complexity and obligateness, however there is a need to extend this to a  
18 broader perspective incorporating the role of the environment. In this paper, we formally  
19 test Bonner's 1998 hypothesis that the environment is crucial in determining the course of  
20 multicellular evolution, with aggregative multicellularity evolving more frequently on land and  
21 clonal multicellularity more frequently in water. Using a combination of scaling theory and  
22 phylogenetic comparative analyses, we describe multicellular organisational complexity  
23 across 139 species spanning 14 independent transitions to multicellularity and investigate  
24 the role of the environment in determining multicellular group formation and in imposing  
25 constraints on multicellular evolution. Our results, showing that the physical environment  
26 has impacted the way in which multicellular groups form, could shed light on the role of the  
27 environment for other major evolutionary transitions.

28

29

30

## 31 Introduction

32 Macroscopic life on earth has been shaped by the evolution of multicellularity from  
33 unicellular ancestors. Multicellularity is a complex and variable trait, ranging from simple cell  
34 aggregations found in yeast to differentiated metazoan organisms, with much diversity in  
35 between [1]. For example, our bodies contain  $10^{14}$  cells with more than 200 specialized  
36 types [2] but *Volvox* is 10 orders of magnitude smaller and has just 2 cell types [3]. Some  
37 lineages have become obligately multicellular, where cells only exist as part of a  
38 multicellular organism (e.g. animals), whereas others remain facultative, switching between  
39 a unicellular and multicellular lifestyle (e.g. cellular slime moulds) [4].

40  
41 A major challenge in evolutionary biology has been to explain this variation in complexity  
42 among multicellular lineages. Social evolution theory has greatly advanced our  
43 understanding of the evolution of multicellularity, primarily through clarifying the factors that  
44 favour the cooperation needed to become multicellular. We understand how relatedness  
45 between cells is crucial in determining when altruism can evolve (for example, in  
46 *Dictyostelium* slime moulds) [5], division of labour between cell types [6] and the  
47 proliferation of cheaters [7-9]. It has also become clear that clonal relatedness ( $r = 1$ ) is a  
48 necessary, albeit not sufficient, condition for the evolution of obligate multicellularity like we  
49 see in animals and plants, and that these lineages have more cell types than those with  
50 facultative multicellularity [4].

51  
52 However, there are limits to the variation in multicellular complexity that is explained by  
53 relatedness. For example, both land plants and fungi have cells that are clonal and  
54 obligately multicellular, but plants have approximately 10 times more cell types than fungi  
55 [10] and it is unclear what can explain these differences. There are good reasons to  
56 speculate that the environment could be an important factor shaping the first trajectories of  
57 multicellular evolution with lasting consequences for later elaborations. Firstly, the  
58 environment itself could determine the way in which multicellular groups form and hence  
59 relatedness between cells. Bonner (1998) observed that clonal group formation, where  
60 daughter cells remain attached to mother cells after division, seems to be more common in  
61 lineages that originated in the sea compared to species that originated on land [11]. If this is  
62 the case, it would mean that the environment where multicellularity originates could have

63 profound consequences for subsequent evolutionary possibilities. Secondly, the physical  
64 constraints associated with living in water or on land are likely to affect many aspects of  
65 phenotypic evolution, for example the need for support and structural reinforcement tissues,  
66 the diversity of dispersal mechanisms, and the sustaining the biomechanics of active  
67 motility.

68  
69 Scaling theories provide powerful tools to test for such constraints, since an organism's  
70 body size can accurately predict complex traits such as metabolic rate, lifespan, and growth  
71 rate [12], and since the shapes of these relationships reflect fundamental physiological  
72 constraints on how diverse organisms can evolve [13]. Scaling relationships can also reveal  
73 outlier taxa that highlight cases where evolutionary innovation fueled the breaking of  
74 ecological and physiological constraints [14]. In practice, scaling parameters (*i.e.* the slope  
75 ( $b$ ) and intercept ( $a$ ) in the equation  $y = aM^b$ ) represent mechanistic hypotheses that, for the  
76 purpose of this study, relate the number of cell types ( $y$ ) to the total number of cells ( $M$ ).  
77 Isometric scaling ( $b = 1$ ) provides a null model, predicting that cell type and cell number  
78 increase at the same rate (every added cell is a new type), and allometric scaling ( $b < 1$ )  
79 would indicate that cell type increases at a slower rate than cell number, such that small  
80 organisms have more cell types relative to their body size.

81  
82 There is a need to build on our understanding of the fundamental factors influencing  
83 multicellular evolution – primarily the role of relatedness – and extend this to a broader  
84 perspective incorporating the role of the environment. The objectives of this paper are to:  
85 (1) describe the variation in multicellular organisational complexity across 139 species by  
86 investigating the scaling relationships between body size (total number of cells) and number  
87 of cell types; (2) use phylogenetically-controlled comparative analyses across 14  
88 independent multicellular transitions to assess the extent to which the environment  
89 determines how multicellular groups form and the consequences for whether obligate  
90 multicellularity evolves; and (3) test whether constraints imposed by the environment can  
91 explain why some lineages have reached higher levels of organisational complexity than  
92 others, and can account for part of the variation in cell-type diversity and differences in  
93 scaling relationships. We use the term organisational complexity to highlight that division of

94 labour is fundamental to multicellularity, that the number of cell types is a marker of division  
95 of labour and that any form of division of labour requires organisational integration.

96

97

## 98 **Results**

99

### 100 ***Describing variation in body size and complexity***

101 Across 139 species, representing 14 independent transitions to multicellularity, the scaling  
102 of cell type and cell number is strongly allometric (reduced major axis regression, RMA):  
103 slope = 0.14, CI = 0.13 - 0.16,  $R^2 = 0.64$ , Figure 1a & b). This means that despite a positive  
104 association, the number of cell types increases much more slowly with cell number than  
105 arithmetic proportionality (i.e. isometric scaling) would predict. In other words, small  
106 organisms are organisationally more complex for their size than large organisms.

107

108 We next found that there was a difference in the scaling relationship between number of cell  
109 types and total number of cells for small versus large species (Table S1, S2). Specifically,  
110 we identified the estimated breakpoint in the regression as  $6.3 \times 10^4$  total number of cells,  
111 corresponding to  $4.8 \pm 0.9$  cell types, where the scaling relationship changes. Small species  
112 (before the breakpoint) showed an allometric slope about twice as steep (RMA: slope =  
113 0.27, CI = 0.23 – 0.33,  $R^2 = 0.61$ ) as large species (above the breakpoint) (RMA: slope =  
114 0.18, CI = 0.15 – 0.23,  $R^2 = 0.15$ ). This implies that larger organisms face a unique set of  
115 more stringent constraints on the accumulation of new cell types than small organisms, and  
116 supports the observation that lineages consisting of small species gain new cell types more  
117 quickly as they grow in size.

118

119 We further sought to understand the substantial reduction in cell type variation explained by  
120 cell number for large organisms (i.e.  $R^2 = 0.15$ ) using a technique called quantile  
121 regression. Regression through the upper 90% quantile of the dataset suggests that there is  
122 an upper threshold to the number of cell types a species can have for its size, whereas  
123 there is a lot of variation in the number of cell types below that threshold (Figure 1a, dashed  
124 lines). This suggests that: there could be other factors limiting the number of cell types  
125 below that threshold and these other limiting factors are especially important in larger

126 species since the slope describing this upper limit is far shallower ( $b = 0.13$ ) than the upper  
 127 limit for small species ( $b = 0.25$ ) (Table S2).

128

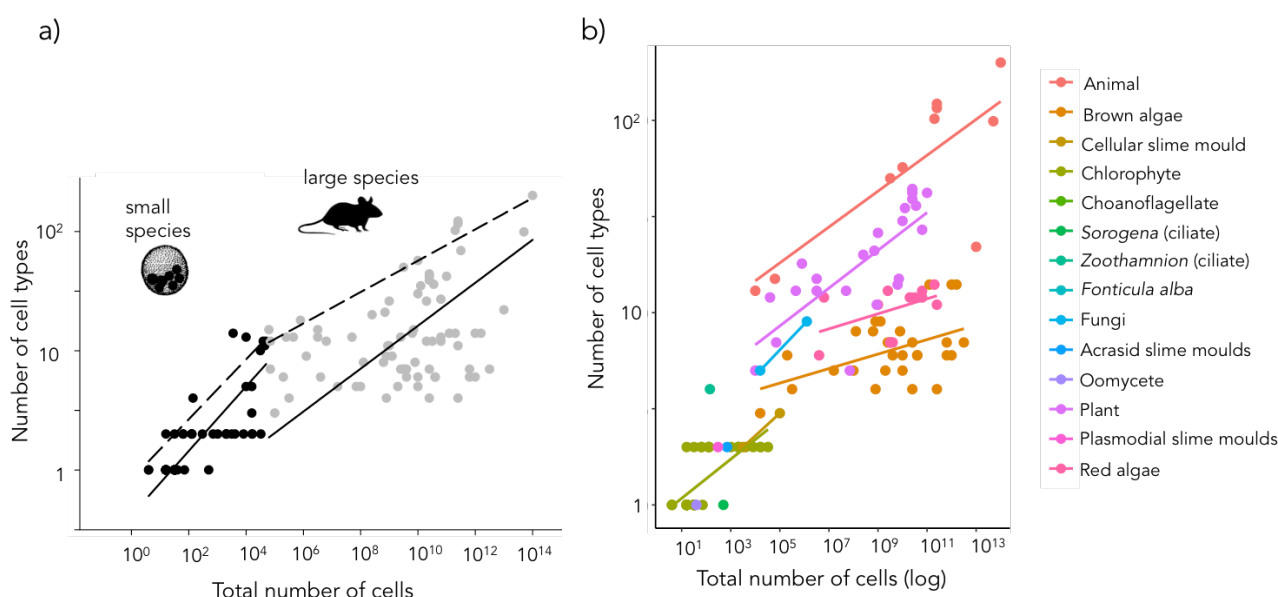

129

130 **Figure 1(a) Scaling across multicellular organisms.** The relationship between number of cell  
 131 types and total number of cells for small (in black, between  $4 - 10^4$  cells) and large multicellular  
 132 species (in grey, between  $10^4 - 10^{14}$  cells) shown on logarithmic axes. Small species show a  
 133 steeper allometry (reduced major axis regression: slope = 0.27 (CI 0.23 - 0.33) compared to large  
 134 species (reduced major axis regression: slope = 0.18 (CI 0.15 - 0.23). Solid lines show the reduced  
 135 major axis regression and dashed lines show regressions through the upper 90% quantile of the  
 136 data. We estimated the breakpoint of  $4.8 \pm 0.9$  (corresponding to  $6.3 \times 10^4$  total cells) using the  
 137 ‘segmented’ package in R. **(b) Multicellular organisational complexity across different**  
 138 **multicellular lineages.** Organisational complexity, measured as both the number of cell types and  
 139 the total number of cells, for each of the independently evolved multicellular lineages. These data  
 140 have been taken from the dataset of Bell & Mooers (1997) [10]. Original data are from the data set of  
 141 Bell & Mooers (1997) and images of *Mus musculus* and *Volvox* are from Phylopic  
 142 (<http://phylopic.org/>). The statistical results of the different regressions are given in Table S1.

143

### 144 ***The origins of multicellularity in different environments***

145 Our results show that the physical environment (whether or not a species lives in the water  
 146 or on land) has had a major impact on both the origins and subsequent elaborations of  
 147 multicellularity, both in determining how multicellular groups originally form and how  
 148 organisational complexity subsequently evolves.

149

150 We found that lineages in aquatic environments were significantly more likely to form  
151 multicellular groups through daughter cells remaining attached to mother cells after division  
152 (clonal group formation) (MCMCglmm, difference between aquatic & terrestrial: posterior  
153 mode = 5.74, credible intervals (CI) = 2.91 – 9.79,  $p_{\text{diff}} = 0.0008$ ,  $N_{\text{species}} = 139$ , Figure 2a).  
154 All of the multicellular lineages in our dataset that have their origins in water form  
155 multicellular groups in this way, whereas two thirds of the lineages that originated on land  
156 form groups through aggregation (non-clonal group formation) (Figure 2a). In fact, there are  
157 only two lineages that originated on land that employ clonal group formation – the Fungi  
158 and the plasmodial slime moulds and these tend to grow in terrestrial environments of  
159 saturated humidity. This result confirms Bonner’s original observation that clonal group  
160 formation is more common in multicellular lineages originating in the sea [11].

161

162 Secondly, we found that the transition to obligate multicellularity was significantly more  
163 likely to occur in aquatic environments compared to on land. Most (5 of 6) lineages that  
164 evolved multicellularity on land remained facultatively multicellular (difference between  
165 aquatic & terrestrial: posterior mode = 6.59, CI = 4.29 – 8.72,  $p_{\text{diff}} = < 0.0001$ ,  $N_{\text{species}} = 139$ ,  
166 Figure 2b). The only multicellular lineage that has evolved obligate multicellularity on land is  
167 the Fungi. This is consistent with this lineage also being a rare example of clonal group  
168 formation that originated on land, as the resulting clonal relatedness between cells is  
169 significantly associated with the transition to obligate multicellularity [4].

170

171 **Table 1: At least 14 transitions to multicellularity occurred within the eukaryotes.** Estimates  
172 of the number of independent transitions in each lineage are given along with the environment  
173 where the lineage originated, average number of cell types, and the corresponding references. We  
174 have not included two other known transitions to multicellularity – the diatoms [15] and  
175 *Sorodiplophrys* (Stramenopiles) [16] – due to a lack of data on cell types and environment of origin.  
176 See Figure 3a.

177

| Lineage | Number of transitions | Average number of cell types | Ancestral environment | Obligate or facultative multicellularity | Reference(s) |
|---------|-----------------------|------------------------------|-----------------------|------------------------------------------|--------------|
|---------|-----------------------|------------------------------|-----------------------|------------------------------------------|--------------|

|                                     |       |       |                       |                        |         |
|-------------------------------------|-------|-------|-----------------------|------------------------|---------|
| Acrasid slime moulds                | 1     | 2     | terrestrial           | facultative            | [17]    |
| Brown algae                         | 1     | 6.9   | aquatic               | obligate               | [18,19] |
| Cellular slime moulds               | 1     | 2     | terrestrial           | facultative            | [20]    |
| Chlorophyte algae                   | 1 - 4 | 1.5   | aquatic               | facultative & obligate | [21]    |
| Choanoflagellates                   | 1     | 1     | aquatic               | facultative            | [22]    |
| Ciliates                            | 2     | 2.5   | terrestrial & aquatic | facultative & obligate | [23-25] |
| <i>Fonticula alba</i> (Fonticulida) | 1     | 2     | terrestrial           | facultative            | [26]    |
| Fungi                               | 2     | 7     | terrestrial           | facultative & obligate | [27,28] |
| Metazoa                             | 1     | 101.6 | aquatic               | obligate               | [28]    |
| Oomycetes                           | 1     | 1     | aquatic               | facultative & obligate | [29]    |
| Plants                              | 1     | 22.2  | aquatic               | obligate               | [28]    |
| Plasmodial slime moulds             | 1     | 2     | terrestrial           | facultative            | [30]    |
| Red algae                           | 1+    | 10.8  | aquatic               | obligate               | [28]    |

178

179

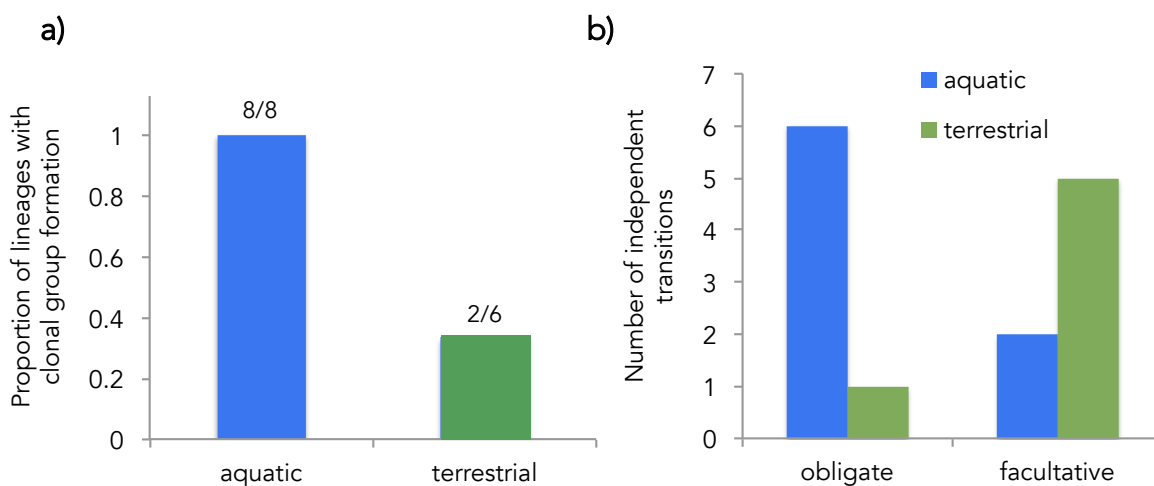

180

181 **Figure 2: The origins of multicellularity in different environments.** (a) The proportion of  
 182 lineages that have clonal group formation that originated in aquatic and terrestrial environments. All  
 183 multicellular lineages that originated in the sea have clonal group formation (8/8 lineages) whereas  
 184 most of the multicellular lineages that originated on land have non-clonal group formation (4/6

185 lineages). **(b)** Multicellular lineages that originated in water more commonly evolve obligate  
186 multicellularity (6/8 lineages) compared to lineages that originated on land, which more often remain  
187 facultatively multicellular (5/6 lineages).

188

### 189 ***Multicellular organisational complexity on land versus in water***

190 We found that the number of cell types of multicellular species currently found on land was  
191 significantly higher than those currently found in aquatic environments (Figure 3a), whilst  
192 controlling for the total number of cells (posterior mode = -0.77, CI = -1.42 to -0.11,  $p_{diff}$  =  
193 0.02,  $N_{species}$  = 137, Figure 3b). The average number of cell types for aquatic lineages is 8  
194 whereas for terrestrial lineages it is 25. Species on land were however not significantly  
195 larger in size than those found in the sea (posterior mode = -2.79, CI = -9.04 to 1.81,  $p_{diff}$  =  
196 0.12,  $N_{species}$  = 137). Overall, there was a significant phylogenetic correlation between  
197 number of cell types and total number of cells, meaning that species with more cell types  
198 also tend to be bigger due to their shared ancestry (posterior mode = 0.90, CI = 0.72 to  
199 0.96,  $p_{diff}$  = < 0.0001,  $N_{species}$  = 137). However, we also found a significant phenotypic  
200 correlation between these two variables, meaning that the association is also a result of a  
201 shared environment (posterior mode = 0.56, CI = 0.19 to 0.76,  $p_{diff}$  = 0.004,  $N_{species}$  = 137).

202

203

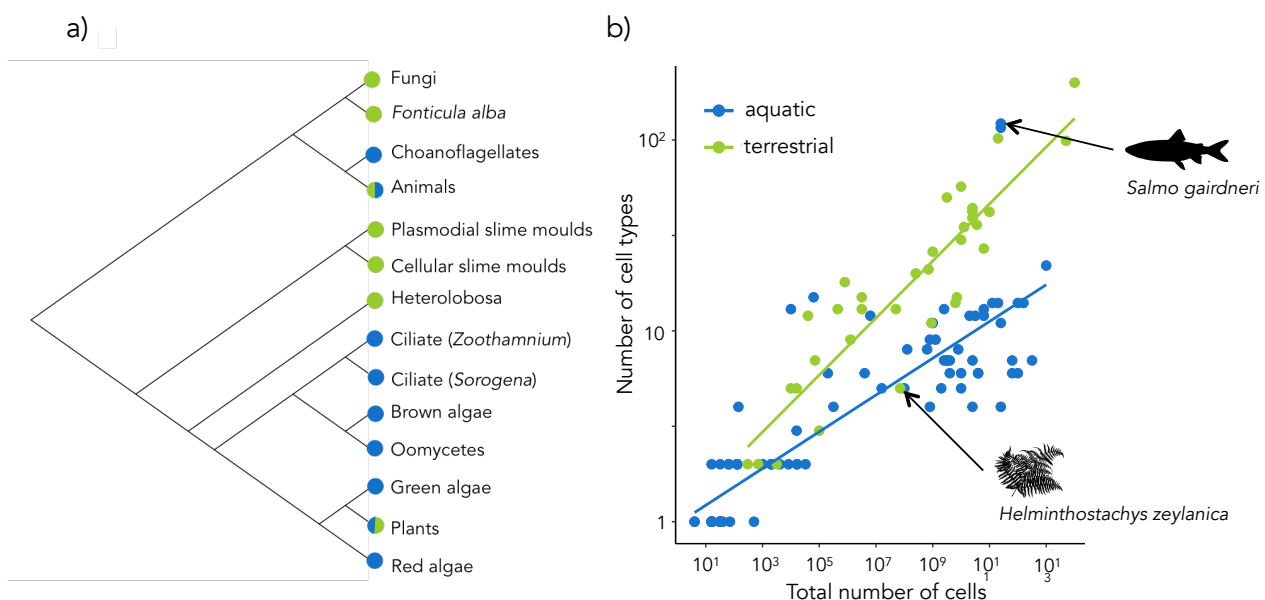

204

205 **Figure 3: Organisational complexity and environmental constraints.** a) A summarised  
206 phylogram of the lineages that have independently evolved multicellularity. The current environment  
207 is shown as terrestrial (in green), aquatic (in blue) or both (half green, half blue) for species that



208 have a substantial number of species in both environments. **b)** Multicellular complexity, measured  
209 as both the number of cell types and the total number of cells, for species currently found in aquatic  
210 and terrestrial environments. Two notable outliers (*Salmo gairdneri* and *Helminthostachys*  
211 *zeylanica*) are highlighted with black arrows and images and further interpreted in the Discussion.  
212 These data have been taken from the dataset of [10].

213

214

## 215 **Discussion**

216

217 We were interested in how multicellular complexity scales with body size and the role the  
218 physical environment could play in shaping the course of multicellular evolution. Overall, we  
219 found that the number of cell types scales allometrically with the total number of cells  
220 (echoing Bonner's observations [1]), and that the specific scaling relationship is different for  
221 small versus large species. Our comparative analyses also show that the environment  
222 (aquatic or terrestrial) has a crucial impact on the trajectory of multicellular evolution. Firstly,  
223 we found that clonal group formation giving rise to obligate multicellularity has been  
224 significantly more common in lineages that evolved in aquatic environments. Secondly, we  
225 showed that current environmental conditions have an impact on multicellular evolution,  
226 with species living on land having a higher number of cell types compared to species found  
227 in aquatic environments.

228

229 Bonner (1998) observed that clonal group formation was more common in multicellular  
230 lineages that evolved in the sea whereas aggregation was more common in terrestrial  
231 lineages. Our results provide formal support for this observation by including additional  
232 lineages and using phylogenetically controlled comparative analyses. Bonner speculated  
233 that this pattern could be because of water currents, meaning that cells in water need to  
234 stick together after they divide if they want to reap the benefits of being in a group [11]. This  
235 is not the case on land, where cells must use active motility (e.g. cilia, flagella, amoeboid  
236 movement) in order to form multicellular groups. It is clear from the species in our dataset  
237 that the multicellular lineages found on land (*Dictyostelium*, *Sorogena*, *Physarum*,  
238 *Fonticula*) all have some form of motile cell stage, and even the Fungi have an ancestral  
239 lineage with motile cells [31]. Therefore, it seems plausible that the biophysics of moving

240 through air and water has had a profound impact on the way in which multicellular groups  
241 could form on land and in the sea.

242

243 It is likely that our dataset underestimates the number of lineages that have facultative  
244 multicellularity. These species have transient multicellular phenotypes and so many species  
245 are still identified as unicellular. For example, *Saccharomyces cerevisiae* has a variety of  
246 multicellular phenotypes [32] and yet is still often not recognised as being facultatively  
247 multicellular [33]. Other lineages, notably the green algae, have evolved facultative  
248 multicellularity many times [21] and there are likely new examples to be found on land as  
249 well. However, it is unlikely that we have underestimated the number of lineages with  
250 obligate multicellularity. This is because these species tend to be bigger and therefore more  
251 visible and complex [4] and potentially better studied [18,34]. There is no obvious reason to  
252 assume that under- or overestimation would be biased towards terrestrial or aquatic  
253 species. By inflating the number of facultative lineages, we would therefore not alter the  
254 pattern and the result we find – that obligate multicellularity has evolved much more often in  
255 water compared to on land.

256

257 Our study reveals a number of intriguing outliers. Firstly, not all species fit the overall  
258 pattern of higher organizational complexity on land. There are outlier species in our dataset,  
259 including several living in aquatic environments that display levels of complexity more  
260 similar to terrestrial species. For example, *Salmo gairdneri* (Rainbow trout) has an  
261 estimated 116 cell types and a total size of  $2.51 \times 10^{11}$  cells, which is more similar to the  
262 terrestrial *Mus musculus* (mouse) than to other aquatic species. Another example is  
263 *Helminthostachys zeylandica* (a member of the fern family) that has much lower complexity  
264 for its size than other terrestrial multicellular species (just 5 cell types) (Figure 3b).  
265 Secondly, a major and strikingly unusual lineage are the Fungi, that develop multicellularity  
266 through clonal group formation but display (mostly) simple multicellularity. However, our  
267 dataset only included 3 species from Kingdom Fungi and there is also a lack of data on  
268 fungal multicellularity in the wider literature. Perhaps a closer look at the Fungi as  
269 ‘exceptions to the rule’ could help to unravel the relationship between the environment and  
270 multicellular complexity.

271

272 Not only does the environment affect how multicellular groups form, but we show that it also  
273 has a major impact on the scaling relationships between size and complexity. Species that  
274 live on land tend to be more complex for their size compared to species that live in water  
275 (i.e., with a higher slope, Figure 3b) and this could be for several reasons. Land dwelling  
276 organisms need more support structures than their aquatic counterparts – this is because  
277 water provides natural support through buoyancy whereas air does not. Organisms living on  
278 land therefore needed to increasingly invest in stems and skeletons to ‘hold themselves’ up  
279 as their body size increases (i.e. skeleton mass  $\sim M^{b > 1}$ , [12]), possible leading to greater  
280 diversification of cell types and tissues than organisms in the sea. This scaling logic can  
281 further be extended to resource allocation dynamics within organisms (e.g., vascular  
282 networks,), although systematic effects on cell diversity and differences between land and  
283 water remain to be elucidated. There are also other potentially confounding physiological  
284 parameters, for example that autotrophic lineages compete for light, both on land and in the  
285 water, whereas heterotrophic lineages do not, but that support tissues on land are more  
286 costly to maintain (e.g. rain forest trees versus kelp forest).

287

288 The parallel evolutionary events towards obligate multicellularity are examples of major  
289 evolutionary transitions in individuality [35]. A key aim of major transition research is to  
290 identify common patterns across different transitions (e.g. the evolution of prokaryote and  
291 eukaryote cells, obligately multicellular organisms, and colonial superorganisms). The fact  
292 that these all arose through clonal group formation or as full sibling families (initiated by  
293 strictly monogamous pairs) implied that reproductive allocation conflicts did not play a role,  
294 as they usually do in promiscuous or chimeric associations that do not make such major  
295 transitions [36,37] [4,38]. Strict vertical transmission of symbionts, including mitochondria  
296 and plastids, was also a potent force to avoid conflict [39]. Our results, showing that the  
297 physical environment has impacted the way in which multicellular groups form, could  
298 therefore shed light on the role of the environment for other major evolutionary transitions.  
299 For example, how have physical conditions across nesting habitats (e.g. subterranean  
300 versus arboreal; [40]) influenced the necessary and sufficient conditions for insect colonies  
301 to commit to obligate division of labour via specialized and physically differentiated castes?

302

303

## 304 **Material and Methods**

305

### 306 ***Data collection***

307 The data used in this study were originally published in Fisher *et al.* (2013) and are stored  
308 in the data depository Dryad (original data can be found here:  
309 <https://datadryad.org/resource/doi:10.5061/dryad.27q59>). In summary, we conducted an  
310 extensive literature search on multicellular species, searching specifically for information on  
311 multicellular complexity, the ways in which groups formed and whether or not they were  
312 obligately or facultatively multicellular. We used data from Bell & Mooers (1997) on the  
313 number of cell types and total number of cells to estimate multicellular complexity for each  
314 multicellular species [10] as this is the most taxonomically-representative dataset on cell  
315 types, to our knowledge [41]. Our full dataset can be found in Table S6.

316

317 In this study, we expanded this original dataset by adding information on the ancestral and  
318 current environment of each species. We considered any species found on land as  
319 terrestrial and any species found in freshwater, brackish or marine environments as  
320 aquatic. We found information about the current environment of a species by searching on  
321 Google Scholar for publications and also taxa-specific websites, such as AlgaeBase and  
322 WoRMs. Where there was only information about ancestral or current environment at a  
323 higher taxonomic level (i.e. at the family level but no generic or species information) we  
324 assumed it was the same environment for the species in our dataset. We found information  
325 on the ancestral environment of each species through broad reviews on the origins of  
326 multicellularity including Bonner 1998, Knoll 2011 & Umen 2014 [11,21,28] . It is important  
327 to stress that we were interested in the ancestral environment *when multicellularity evolved*  
328 and therefore that was not always the same as the ancestral environment for the whole  
329 lineage, including unicellular groups (e.g. for the Fungi, James *et al.* 2006).

330

331 Of the 139 species in the dataset, 18 species had a terrestrial ancestral environment and  
332 121 species had an aquatic ancestral environment. For the current environment, 84 species  
333 are aquatic, 43 are terrestrial and 12 are unknown.

334

### 335 ***Independent transitions to multicellularity***

336 Using information from published papers, we identified that within the eukaryotes there  
337 have been at least 14 independent transitions to multicellularity (both facultative and  
338 obligate) (Table 1, Figure 3a). However, we have most likely underestimated the number of  
339 transitions in several groups due to uncertainty about the number of independent transitions  
340 within them. For example, it is thought that there have been at least 2 transitions to obligate  
341 multicellularity within the Fungi [27,28] and many transitions to facultative multicellularity in  
342 the green algae [21] and in the red algae [18] . Therefore, our analyses are conservative  
343 and assumed just 1 transition within each group.

344

## 345 **Statistical Methods**

346

### 347 ***Scaling relationships***

348 As a first step in analyzing the data we began with a least square regression to estimate  $a$   
349 and  $b$  in the scaling equation  $\log_{10}y = \log_{10}a + b\log_{10}M$  and describe nature of the  
350 dependence of the number of cell types on the total number of cells. We used the R  
351 package 'lmodel2', we used reduced major axis (RMA) regression to estimate the intercept  
352 and slope in the scaling of  $\log_{10}(\text{cell type})$  against  $\log_{10}(\text{cell number})$  across all data, for  
353 small species and for large species. RMA is an appropriate line-fitting method in cases  
354 when measurement of both Y and X variables are potentially associated with systematic  
355 error (e.g. the probability that cell number was precisely measured decreased with  
356 increasing body sizes) [42]. RMA (also known as standardized major axis regression)  
357 equally weights distances from the regression line in both X and Y directions, with the major  
358 axis reflecting the first principal components axis yielded by the covariance matrix, and  
359 fitted through the centroid of the data [42]. We then used the package 'segmented' in R [43]  
360 to test if there is a 'breakpoint' in the regression – the point at which the shape of the  
361 relationship changes dramatically. This allowed us to estimate the different scaling  
362 relationships of small versus larger multicellular species.

363

364 We also noted that the scaling relationships appeared triangular and thus hypothesized that  
365 they reflect a constraint function such that total number of cells is necessary, but not  
366 sufficient to explain variation in number of cell types [44,45]. To test this hypothesis, we

367 used least absolute deviation regression to describe scaling for the upper ninetieth  
368 quantiles of the overall plot and separately for the small and large taxa plots [46,47].

369

### 370 ***Bayesian analyses***

371 We used the statistical package MCMCglmm [48] to run Bayesian general linear models  
372 with Markov Chain Monte Carlo (MCMC) estimation. We fitted three models. Firstly, we  
373 tested whether the environment affected the way in which multicellular groups form by fitting  
374 a model with group formation as a categorical response variable and the ancestral  
375 environment as a categorical explanatory variable (Table S1). Secondly, we tested whether  
376 the environment affected the likelihood of obligate or facultative multicellularity by fitting a  
377 model with obligate/facultative as a categorical response variable and the ancestral  
378 environment as a categorical explanatory variable (Table S3).

379

380 Finally, we tested whether multicellular complexity differed between lineages living on the  
381 land versus in aquatic environments by fitting a multi-response model with several  
382 explanatory variables using the number of cell types and the logarithm of total number of  
383 cells as poisson and Gaussian response variables respectively (Table S4). This allowed us  
384 to use both number of cell types and the total number of cells as a combined measure of  
385 multicellular complexity, rather than having to run several analyses using different response  
386 variables. We fitted several categorical fixed effects: the current environment (aquatic or  
387 terrestrial), whether the species is obligately or facultatively multicellular, and the mode of  
388 group formation (non-clonal or clonal) to control for the known effects of group formation  
389 and obligateness on complexity [4].

390

391 In the first two models, we used uninformative inverse-gamma priors because we had a  
392 categorical response variable. We also fixed the residual variance to 1 and specified family  
393 = categorical. In the final model, we used uninformative priors because we had a multi-  
394 response model with both poisson and Gaussian response variables and categorical  
395 explanatory variables. We ran the models for 6000000 iterations, with a burn-in of 1000000  
396 and a thinning interval of 1000. These were the values that optimised the chain length  
397 whilst also allowing our models to converge, which we assessed visually using VCV  
398 traceplots. We then ran each model three times and used the Gelman-Rubin diagnostic to

399 quantitatively check for convergence. We showed our models had converged when the  
400 PSR was  $< 1.1$ .

401

402 We calculated the correlations between the number of cell types and the total number of  
403 cells ( $\text{cov}(\text{number of cell types, total number of cells})/\sqrt{\text{var}(\text{number of cell types}) *}$   
404  $\text{var}(\text{total number of cells})$ ) for species in different environments. We tested if the correlation  
405 was significantly different between environments by examining if the 95% credible interval  
406 of the difference between the correlations spanned 0, and calculating the % of iterations  
407 where the correlation for species living in aquatic environments was greater than that for  
408 those living on land.

409

### 410 ***Phylogeny construction***

411 We built the phylogeny for this study using the Open Tree of Life ([opentreeoflife.org](http://opentreeoflife.org)), which  
412 creates synthetic trees built from published phylogenies and taxonomic information. We  
413 then used the R package 'rotl' that interacts with the online database and constructs  
414 phylogenies (<https://cran.r-project.org/web/packages/rotl/index.html>). For the majority of  
415 species in our dataset, the exact species was also present in a published phylogeny and so  
416 we could use phylogenetic information about that species. However, for a few species that  
417 were not present in the Open Tree of Life dataset, we had to assign instead a closely  
418 related species in the same genera or use a family-level classification. Due to the fact that  
419 most species in our dataset represent distant groups on the eukaryotic tree and our  
420 phylogeny does not include branch lengths, we were confident this compromise did not  
421 affect our statistical analysis.

422

### 423 **Funding**

424 RMF was supported by a Carlsberg Distinguished Post-doctoral Fellowship (CF16-0336)  
425 and JZS was supported by a European Research Council Starting Grant (ELEVATE).

426

### 427 **Acknowledgements**

428 We thank Stuart West and Guy Cooper for thought-provoking discussions and comments  
429 and Stefania Kapsetaki, Jordan Okie, and Jamie Gillooly for helpful edits on a final version  
430 of the manuscript. We dedicate this paper to John Tyler Bonner.

431

432 **References**

433

- 434 1. Bonner, J. T. 2004 Perspective: the size-complexity rule. *Evolution* **58**, 1883–1890.
- 435 2. Buss, L. W. 1983 Evolution, development, and the units of selection. *Proceedings of the*  
436 *National Academy of Sciences of the United States of America* **80**, 1387–1391.
- 437 3. Herron, M. D. 2016 Origins of multicellular complexity: Volvox and the volvocine algae. *Mol.*  
438 *Ecol.* **25**, 1213–1223. (doi:10.1111/mec.13551)
- 439 4. Fisher, R. M., Cornwallis, C. K. & West, S. 2013 Group Formation, Relatedness, and the  
440 Evolution of Multicellularity. *Current Biology* **23**, 1120–1125. (doi:10.1016/j.cub.2013.05.004)
- 441 5. Strassmann, J. E., Zhu, Y. & Queller, D. C. 2000 Altruism and social cheating in the social  
442 amoeba *Dictyostelium discoideum*. *Nature* **408**, 965–967.
- 443 6. Cooper, G. A. & West, S. 2018 Division of labour and the evolution of extreme specialization.  
444 *Nature Publishing Group* **2**, 1161–. (doi:10.1038/s41559-018-0564-9)
- 445 7. Velicer, G. J., Kroos, L. & Lenski, R. E. 2000 Developmental cheating in the social bacterium  
446 *Myxococcus xanthus*. *Nature* **404**, 598–. (doi:10.1038/35007066)
- 447 8. Kuzdzal-Fick, J. J., Fox, S. A., Strassmann, J. E. & Queller, D. C. 2011 High Relatedness Is  
448 Necessary and Sufficient to Maintain Multicellularity in *Dictyostelium*. *Science* **334**, 1548–  
449 1551. (doi:10.1126/science.1213272)
- 450 9. Regenberg, B., Hanghøj, K. E., Andersen, K. & Boomsma, J. J. 2016 Clonal yeast biofilms  
451 can reap competitive advantages through cell differentiation without being obligatorily  
452 multicellular. *Proceedings of the Royal Society B: Biological Sciences* **283**, 20161303.  
453 (doi:10.1098/rspb.2016.1303)
- 454 10. Bell, G. & Mooers, A. 1997 Size and complexity among multicellular organisms. *Biological*  
455 *Journal of the Linnean Society* **60**, 345–363.
- 456 11. Bonner, J. T. 1998 The origins of multicellularity. *Integrative Biology Issues News and*  
457 *Reviews* **1**, 27–36.
- 458 12. Peters, R. H. 1986 *The Ecological Implications of Body Size*. Cambridge University Press.
- 459 13. Thompson, D. W. 1961 *On Growth and Form*. Cambridge University Press.
- 460 14. Brown, J. H., Gillooly, J. F., Allen, A. P., Savage, V. M. & West, G. B. 2004 Toward a  
461 metabolic theory of ecology. *Ecology*, 1771–1789.
- 462 15. Beardall, J., Allen, D., Bragg, J., Finkel, Z. V., Flynn, K. J., Quigg, A., Rees, T. A. V.,  
463 Richardson, A. & Raven, J. A. 2009 Allometry and stoichiometry of unicellular, colonial and  
464 multicellular phytoplankton. *New Phytol.* **181**, 295–309. (doi:10.1111/j.1469-  
465 8137.2008.02660.x)
- 466 16. Tice, A. K., Silberman, J. D., Walthall, A. C., Le, K. N. D., Spiegel, F. W. & Brown, M. W.



- 467 2016 Sorodiplophrys stercorea: Another Novel Lineage of Sorocarpic Multicellularity. *Journal*  
468 *of Eukaryotic Microbiology* **63**, 623–628. (doi:10.1111/jeu.12311)
- 469 17. Brown, M. W., Kolisko, M., Silberman, J. D. & Roger, A. J. 2012 Aggregative Multicellularity  
470 Evolved Independently in the Eukaryotic Supergroup Rhizaria. *Current Biology* **22**, 1123–  
471 1127. (doi:10.1016/j.cub.2012.04.021)
- 472 18. Knoll, A. 2011 The Multiple Origins of Multicellularity. *Annual Review of Earth and Planetary*  
473 *Sciences* **39**, 217–239.
- 474 19. Cock, J. M. et al. 2010 The Ectocarpus genome and the independent evolution of  
475 multicellularity in brown algae. *Nature* **465**, 617–621. (doi:10.1038/nature09016)
- 476 20. Schaap, P. et al. 2006 Molecular phylogeny and evolution of morphology in the social  
477 amoebas. *Science* **314**, 661–663. (doi:10.1126/science.1130670)
- 478 21. Umen, J. G. 2014 Green Algae and the Origins of Multicellularity in the Plant Kingdom. *Cold*  
479 *Spring Harb Perspect Biol* **6**. (doi:10.1101/cshperspect.a016170)
- 480 22. King, N. 2004 The unicellular ancestry of animal development. *Dev Cell* **7**, 313–325.
- 481 23. Sugimoto, H. & Endoh, H. 2006 Analysis of fruiting body development in the aggregative  
482 ciliate Sorogena stoianovitchae (Ciliophora, Colpodea). *Journal of Eukaryotic Microbiology*  
483 **53**, 96–102. (doi:10.1111/j.1550-7408.2005.00077.x)
- 484 24. Olive, L. S. & Blanton, R. L. 1980 Aerial Sorocarp Development by the Aggregative Ciliate,  
485 Sorogena stoianovitchae. *Protozoology* **27**, 293–299.
- 486 25. Summers, F. 1938 Some aspects of normal development in the colonial ciliate Zoothamnion  
487 alternans. *Biol. Bull.*, 117–129.
- 488 26. Brown, M. W., Spiegel, F. W. & Silberman, J. D. 2009 Phylogeny of the ‘forgotten’ cellular  
489 slime mold, *Fonticula alba*, reveals a key evolutionary branch within Opisthokonta. *Mol Biol*  
490 *Evol* **26**, 2699–2709. (doi:10.1093/molbev/msp185)
- 491 27. Nguyen, T. A., Cisse, O. H., Wong, J. Y., Zheng, P., Hewitt, D., Nowrousian, M., Stajich, J. E.  
492 & Jedd, G. 2017 Innovation and constraint leading to complex multicellularity in the  
493 Ascomycota. *Nat Commun* **8**. (doi:10.1038/ncomms14444)
- 494 28. Knoll, A. H. 2011 The Multiple Origins of Complex Multicellularity. *Annu Rev Earth Pl Sc* **39**,  
495 217–239. (doi:10.1146/annurev.earth.031208.100209)
- 496 29. Hesse, M. & Kusel-Fetzmann, E. 1989 Life cycle and ultrastructure of *Ducellieria chodati*  
497 (Oomycetes). *Plant systematics and evolution* **165**, 1–15.
- 498 30. Everhart, S. & Keller, H. 2008 Life history strategies of corticolous myxomycetes: the life  
499 cycle, plasmodial types, fruiting bodies, and taxonomic orders. *Fungal Diversity* **29**, 1–16.
- 500 31. James, T. Y. et al. 2006 Reconstructing the early evolution of Fungi using a six-gene  
501 phylogeny. *Nature* **443**, 818–822. (doi:10.1038/nature05110)
- 502 32. Brückner, S. & Mösch, H.-U. 2011 Choosing the right lifestyle: adhesion and development in  
503 *Saccharomyces cerevisiae*. *FEMS Microbiology Reviews* **36**, no–no. (doi:10.1111/j.1574-  
504 6976.2011.00275.x)

- 505 33. Fisher, R. M. & Regenberg, B. 2019 Multicellular group formation in *Saccharomyces*  
506 *cerevisiae*. *Proceedings of the Royal Society B: Biological Sciences* **286**, 20191098.  
507 (doi:10.1098/rspb.2019.1098)
- 508 34. Grosberg, R. K. & Strathmann, R. R. 2007 The Evolution of Multicellularity: A Minor Major  
509 Transition? *Annu Rev Ecol Evol S* **38**, 621–654.  
510 (doi:10.1146/annurev.ecolsys.36.102403.114735)
- 511 35. West, S., Fisher, R. M., Gardner, A. & Kiers, E. T. 2015 Major evolutionary transitions in  
512 individuality. *Proceedings of the National Academy of Sciences of the United States of*  
513 *America* (doi:10.1073/pnas.1421402112)
- 514 36. Boomsma, J. J. 2007 Kin selection versus sexual selection: why the ends do not meet.  
515 *Current Biology* **17**, 673–683.
- 516 37. Boomsma, J. J. 2009 Lifetime monogamy and the evolution of eusociality. pp. 3191–  
517 3207.(doi:10.1098/rstb.2009.0101)
- 518 38. Boomsma, J. J. & Gawne, R. 2018 Superorganismality and caste differentiation as points of  
519 no return: how the major evolutionary transitions were lost in translation. *Biol Rev Camb*  
520 *Philos Soc* **93**, 28–54. (doi:10.1111/brv.12330)
- 521 39. Fisher, R. M., Henry, L. M., Cornwallis, C. K., Kiers, E. T. & West, S. 2017 The evolution of  
522 host-symbiont dependence. *Nat Commun* **8**, 1–8. (doi:10.1038/ncomms15973)
- 523 40. Lucky, A., Trautwein, M. D., Guénard, B. S., Weiser, M. D. & Dunn, R. R. 2013 Tracing the  
524 rise of ants - out of the ground. *PLoS ONE* **8**, e84012. (doi:10.1371/journal.pone.0084012)
- 525 41. Arendt, D. et al. 2016 The origin and evolution of cell types. *Nature Publishing Group*, 1–15.  
526 (doi:10.1038/nrg.2016.127)
- 527 42. Warton, D. I., Wright, I. J., Falster, D. S. & Westoby, M. 2006 Bivariate line-fitting methods for  
528 allometry. *Biol Rev Camb Philos Soc* **81**, 259–291. (doi:10.1017/S1464793106007007)
- 529 43. Muggeo, V. M. R. 2003 Estimating regression models with unknown break-points. *Stat Med*  
530 **22**, 3055–3071. (doi:10.1002/sim.1545)
- 531 44. Cade, B. S. & Noon, B. R. 2003 A gentle introduction to quantile regression for ecologists.  
532 *Frontiers in Ecology and the Environment* **1**, 412–420.
- 533 45. Brown, J. H. 1995 *Macroecology*. University of Chicago Press.
- 534 46. Koenker, R. 2005 *Quantile Regression*. Cambridge University Press.
- 535 47. Cade, B. & Richards, J. 2013 *User Manual for Blossom Statistical Software*. CreateSpace.
- 536 48. Hadfield, J. D. & Nakagawa, S. 2010 General quantitative genetic methods for comparative  
537 biology: phylogenies, taxonomies and multi-trait models for continuous and categorical  
538 characters. *Journal of Evolutionary Biology* **23**, 494–508. (doi:10.1111/j.1420-  
539 9101.2009.01915.x)

540
