# Supplementary material for: The evolution of multicellular complexity: the role of relatedness and environmental constraints
Source: bioRxiv or medRxiv preprint supplement (doi:10.1101/836940), 2019-11-09
Supplement: Supplementary file [file media-1.pdf]

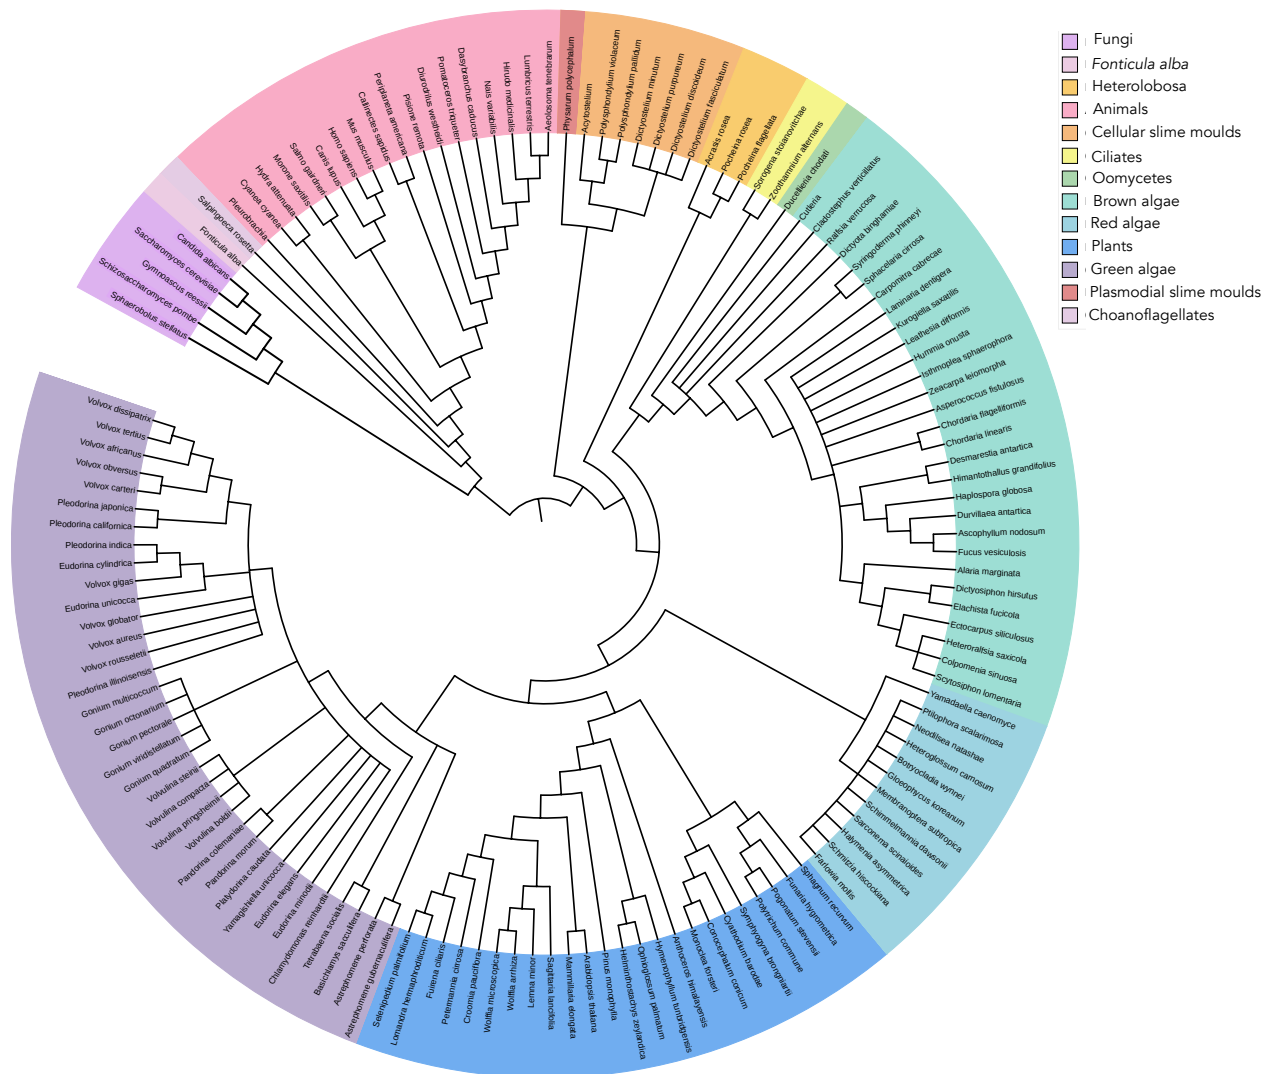

525 **Figure S1: Phylogeny of the multicellular lineages in our dataset.** Phylogeny created using the  
 526 Open Tree of Life and 'rotl' package in R and edited using the online software Interactive Tree of  
 527 Life. Each lineage that independently evolved multicellularity within the Eukaryotes is highlighted in  
 528 a different colour and the species that appear in our dataset are given at the tips.

532 **Supplementary Statistical Results Tables**

533

534 **Table S1:** Statistical results from Least squares (OLS) and Reduced Major Axis (RMA) Regression

535 on the full dataset, small species and large species. \*slopes are significantly different from 0

536

| Model       | N   | Intercept<br>(2.5% - 97.5%<br>confidence intervals) | Slope<br>(2.5% - 97.5% confidence<br>intervals) | R <sup>2</sup> | p value |
|-------------|-----|-----------------------------------------------------|-------------------------------------------------|----------------|---------|
| OLS (all)   | 126 | 0.03 (-0.09 – 0.15)                                 | 0.11 (0.10 – 0.13)                              | 0.64           | 0.01*   |
| OLS (small) | 50  | -0.23 (-0.37 – 0.09)                                | 0.21 (0.16 – 0.26)                              | 0.61           | 0.01*   |
| OLS (large) | 76  | 0.46 (0.08 – 0.83)                                  | 0.07 (0.03 – 0.11)                              | 0.15           | 0.01*   |
| RMA (all)   | 126 | -0.16 (-0.27 - -0.06)                               | 0.14 (0.13 – 0.16)                              | NA             | NA      |
| RMA (small) | 50  | -0.38 (-0.52 - -0.27)                               | 0.27 (0.23 – 0.33)                              | NA             | NA      |
| RMA (large) | 76  | -0.59 (-1.00 - -0.26)                               | 0.18 (0.15 – 0.23)                              | NA             | NA      |

537

538 **Table S2 :** Statistical results from the 90% Regression on the small and large species.

| Model                              | N   | Intercept<br>(2.5% - 97.5% confidence<br>intervals) | Slope<br>(2.5% - 97.5% confidence<br>intervals) |
|------------------------------------|-----|-----------------------------------------------------|-------------------------------------------------|
| 90% Quantile<br>regression (small) | 126 | -0.08 (-0.50 – 0.35)                                | 0.25 (0.10 – 0.40)                              |
| 90% Quantile<br>regression (large) | 76  | 0.44 (0.13 – 0.76)                                  | 0.13 (0.10 – 0.17)                              |

539

540

541 **Table S3:** Analysis of the effect of the ancestral environment on the mode of multicellular group

542 formation, taking into account phylogenetic relationships using MCMCglmm.

543

| <b>Response:</b> Mode of group formation |             |   |                      |        |
|------------------------------------------|-------------|---|----------------------|--------|
| Fixed effect                             |             | N | Posterior mode (CI)  | pMCMC  |
| Ancestral environment                    | Aquatic     |   | 4.80 (1.26 – 7.58)   |        |
|                                          | Terrestrial |   | -1.43 (-4.78 – 0.80) |        |
|                                          | Difference  |   | 5.74 (2.91 – 9.79)   | 0.0008 |

544

545  
 546 **Table S4:** Analysis of the effect of the ancestral environment on whether a species is obligately or  
 547 facultatively multicellular, taking into account phylogenetic relationships using MCMCglmm.

548

**Response:** Obligate or facultative

| Fixed effect          |             | N | Posterior mode (CI)   | pMCMC    |
|-----------------------|-------------|---|-----------------------|----------|
| Ancestral environment | Aquatic     |   | 4.04 (2.39 – 5.97)    |          |
|                       | Terrestrial |   | -2.02 (-4.09 - -0.49) |          |
|                       | Difference  |   | 6.59 (4.29 – 8.72)    | < 0.0001 |

549

550

551 **Table S5:** Analysis of the effect of the current environment, whether the species is obligately or  
 552 facultatively multicellular and the mode of group formation on the number of cell types and the total  
 553 number of cells, taking into account phylogenetic relationships using MCMCglmm.

554

**Response:** The number of cell types

| Fixed Effect            |             | N | Posterior mode (CI)   | pMCMC |
|-------------------------|-------------|---|-----------------------|-------|
| Current environment     | Aquatic     |   | -0.11 (-1.56 – 1.70)  |       |
|                         | Terrestrial |   | 0.53 (-0.72 – 2.36)   |       |
|                         | Difference  |   | -0.77 (-1.42 - -0.11) | 0.02  |
| Obligate or facultative | Obligate    |   | 1.97 (-0.36 – 3.87)   |       |
|                         | Facultative |   | 0.38 (-1.49 – 1.77)   |       |
|                         | Difference  |   | 1.68 (0.06 – 3.24)    | 0.02  |
| Mode of group formation | Clonal      |   | 0.11 (-1.75 – 2.33)   |       |
|                         | Non-clonal  |   | 0.18 (-1.46 – 1.82)   |       |
|                         | Difference  |   | -0.19 (-1.66 – 1.43)  | 0.43  |

**Response:** Total number of cells

| Fixed Effect        |             | N | Posterior mode        | pMCMC |
|---------------------|-------------|---|-----------------------|-------|
| Current environment | Aquatic     |   | 9.80 (-5.03 – 20.82)  |       |
|                     | Terrestrial |   | 13.21 (-2.16 – 23.22) |       |

|                         |             |  |                      |       |
|-------------------------|-------------|--|----------------------|-------|
|                         | Difference  |  | -2.79 (-9.04 – 1.81) | 0.12  |
| Obligate or facultative | Obligate    |  | 7.95 (0.94 – 12.97)  |       |
|                         | Facultative |  | 3.40 (-1.66 – 9.01)  |       |
|                         | Difference  |  | 3.89 (0.65 – 6.62)   | 0.007 |
| Mode of group formation | Clonal      |  | 1.78 (-3.36 – 7.71)  |       |
|                         | Non-clonal  |  | 3.23 (-1.83 – 9.15)  |       |
|                         | Difference  |  | 1.46 (-1.98 – 4.51)  | 0.23  |

### Correlations

|                                              |                          |                    |          |
|----------------------------------------------|--------------------------|--------------------|----------|
| Number of cell types : Total number of cells | Phylogenetic correlation | 0.90 (0.72 – 0.96) | < 0.0001 |
|                                              | Phenotypic correlation   | 0.56 (0.19 – 0.76) | 0.004    |

555  
556
