# Supplementary material for: The evolution of multicellular complexity: the role of relatedness and environmental constraints
Source: bioRxiv or medRxiv preprint supplement (doi:10.1101/836940), 2019-11-09
Supplement: Supplementary file [file media-2.pdf]

557 **Table S6:** The full dataset, with corresponding references, for all of the data used in our analyses.

| Species                             | Obligate or facultative | Number of cell types | Total number of cells | Group formation | Current environment | Ancestral environment | Reference(s)                                                                       |
|-------------------------------------|-------------------------|----------------------|-----------------------|-----------------|---------------------|-----------------------|------------------------------------------------------------------------------------|
| <i>Acrasis rosea</i>                | facultative             | 2                    | 707.9457844           | non-clonal      | terrestrial         | terrestrial           | Raper 1984, Bonner 2003, Brown <i>et al.</i> 2011                                  |
| <i>Acytostelium</i>                 | facultative             | 1                    | NA                    | non-clonal      | terrestrial         | terrestrial           | Bonner 2003, Bourke 2011                                                           |
| <i>Aelosoma tenebrarum</i>          | obligate                | 12                   | 50118.72              | clonal          | NA                  | aquatic               | Brace 1901                                                                         |
| <i>Alaria marginata</i>             | obligate                | 14                   | 1.00E+12              | clonal          | aquatic             | aquatic               | Kain 1979, Charrier <i>et al.</i> 2007                                             |
| <i>Anthoceros himalayensis</i>      | obligate                | 12                   | 39810.71706           | clonal          | terrestrial         | aquatic               | Henra & Handoo 1953, Nishiyama 2007                                                |
| <i>Arabidopsis thaliana</i>         | obligate                | 30                   |                       | clonal          | terrestrial         | aquatic               | Carroll 2001, Lin <i>et al.</i> 1999                                               |
| <i>Ascophyllum nodosum</i>          | obligate                | 6                    | 6.31E+11              | clonal          | aquatic             | aquatic               | Rawlence 1978, Charrier <i>et al.</i> 2007                                         |
| <i>Asperococcus fistulosus</i>      | obligate                | 5                    | 10000000000           | clonal          | aquatic             | aquatic               | Bold & Wynne 1978, Charrier <i>et al.</i> 2007                                     |
| <i>Astrephomene gubernaculifera</i> | obligate                | 2                    | 64                    | clonal          | aquatic             | aquatic               | Stein 1958, Herron & Michod 2008, Hallmann 2011                                    |
| <i>Astrephomene perforata</i>       | obligate                | 2                    | 64                    | clonal          | aquatic             | aquatic               | Herron & Michod 2008, Hallmann 2011                                                |
| <i>Basichlamys sacculifera</i>      | obligate                | 1                    | 4                     | clonal          | aquatic             | aquatic               | Nozaki <i>et al.</i> 1996, Hallmann 2011                                           |
| <i>Beckerlla scalaramosa</i>        | obligate                | 12                   | 31622776600           | clonal          | aquatic             | aquatic               | Kraft 1976, Graham 1985                                                            |
| <i>Botryocladia wynnei</i>          | obligate                | 6                    | 3981071.706           | clonal          | aquatic             | aquatic               | Ballantine 1985, Graham 1985                                                       |
| <i>Callinectes sapidus</i>          | obligate                | 69                   | 3.16E+11              | clonal          | NA                  | aquatic               | Johnson 1980                                                                       |
| <i>Candida albicans</i>             | facultative             | 3                    | NA                    | clonal          | NA                  | terrestrial           | Engelberg <i>et al.</i> 1998, Whiteway & Bachewich 2007                            |
| <i>Canis familiaris</i>             | obligate                | 99                   | 5.01E+13              | clonal          | terrestrial         | aquatic               | Adam <i>et al.</i> 1983                                                            |
| <i>Carpomitra cabrecae</i>          | obligate                | 7                    | 2511886432            | clonal          | aquatic             | aquatic               | Motomura <i>et al.</i> 1985, Charrier <i>et al.</i> 2007                           |
| <i>Chlamydomonas reinhardtii</i>    | facultative             | 1                    | 71                    | clonal          | aquatic             | aquatic               | Bold & Wynne 1985, Kirk 1998, Lurling <i>et al.</i> 2006, Becks <i>et al.</i> 2010 |
| <i>Chordaria flagelliformis</i>     | obligate                | 6                    | 3981071706            | clonal          | aquatic             | aquatic               | Kornmann 1962, Charrier                                                            |

|                                   |             |    |             |            |             |             |                                                           |
|-----------------------------------|-------------|----|-------------|------------|-------------|-------------|-----------------------------------------------------------|
|                                   |             |    |             |            |             |             | <i>et al. 2007</i>                                        |
| <i>Chordaria linearis</i>         | obligate    | 6  | 10000000000 | clonal     | aquatic     | aquatic     | Searles 1980, Charrier <i>et al. 2007</i>                 |
| <i>Cladostephus verticillatus</i> | obligate    | 8  | 125892541.2 | clonal     | aquatic     | aquatic     | Sauvageau 1907, Charrier <i>et al. 2007</i>               |
| <i>Colpomenia sinuosa</i>         | obligate    | 5  | 1995262315  | clonal     | aquatic     | aquatic     | Wynne 1972, Charrier <i>et al. 2007</i>                   |
| <i>Conocephalum conicum</i>       | obligate    | 15 | 3162277.66  | clonal     | terrestrial | aquatic     | Maybrook 1914, Nishiyama 2007                             |
| <i>Croomia pauciflora</i>         | obligate    | 42 | 25118864320 | clonal     | terrestrial | aquatic     | Tomlinson & Ayensu 1968                                   |
| <i>Cutleria</i>                   | obligate    | 7  | 3162277660  | clonal     | aquatic     | aquatic     | Bold & Wynne 1978, Charrier <i>et al. 2007</i>            |
| <i>Cyanea cyanea</i>              | obligate    | 22 | 1.00E+13    | clonal     | aquatic     | aquatic     | Hyman 1940                                                |
| <i>Cyathodium barodae</i>         | obligate    | 13 | 50118723.36 | clonal     | terrestrial | aquatic     | Chavran 1937, Nishiyama 2007                              |
| <i>Dasybranchus caducus</i>       | obligate    | 10 | 31622.7766  | clonal     | NA          | aquatic     | Bookhaut 1957                                             |
| <i>Desmarestia antarctica</i>     | obligate    | 7  | 6.31E+11    | clonal     | aquatic     | aquatic     | Moe & Silva 1989, Charrier <i>et al. 2007</i>             |
| <i>Dictyosiphon hirsutus</i>      | obligate    | 6  | 39810717060 | clonal     | aquatic     | aquatic     | Peters 1992, Charrier <i>et al. 2007</i>                  |
| <i>Dictyostelium discoideum</i>   | facultative | 3  | 100000      | non-clonal | terrestrial | terrestrial | Kaiser 1986, Raper 1940, Rokas 2008                       |
| <i>Dictyostelium fasciculatum</i> | facultative | 2  | NA          | non-clonal | terrestrial | terrestrial |                                                           |
| <i>Dictyostelium minutum</i>      | facultative | 2  | 3162.27766  | non-clonal | terrestrial | terrestrial | Kaiser 198                                                |
| <i>Dictyostelium purpureum</i>    | facultative | 2  | NA          | non-clonal | terrestrial | terrestrial | Mehdiabadi <i>et al.</i> (2009)                           |
| <i>Dictyota binghamiae</i>        | obligate    | 4  | 2.51E+11    | clonal     | aquatic     | aquatic     | Foster <i>et al.</i> 1972, Charrier <i>et al. 2007</i>    |
| <i>Diurodrilus westheidi</i>      | obligate    | 14 | 3548.134    | clonal     | NA          | aquatic     | Kristensen & Niilon 1982                                  |
| <i>Ducellieria chodati</i>        | obligate    | 1  | 40          | clonal     | aquatic     | aquatic     | Hesse <i>et al.</i> 1989                                  |
| <i>Durvillaea antarctica</i>      | obligate    | 6  | 1.00E+12    | clonal     | aquatic     | aquatic     | Naylor 1949, Charrier <i>et al. 2007</i>                  |
| <i>Ectocarpus siliculosus</i>     | obligate    | 4  | 316227.766  | clonal     | aquatic     | aquatic     | Knight 1931, Charrier <i>et al. 2007</i>                  |
| <i>Elachista fucicola</i>         | obligate    | 5  | 15848931.92 | clonal     | aquatic     | aquatic     | Koeman & Cortel-Breeman 1976, Charrier <i>et al. 2007</i> |
| <i>Eudorina cylindrica</i>        | obligate    | 2  | 16          | clonal     | aquatic     | aquatic     | Herron & Michod 2008, Hallmann 2011                       |

|                                    |             |     |             |            |             |             |                                                       |
|------------------------------------|-------------|-----|-------------|------------|-------------|-------------|-------------------------------------------------------|
| <i>Eudorina elegans</i>            | obligate    | 1   | 32          | clonal     | aquatic     | aquatic     | Hallmann 2011                                         |
| <i>Eudorina minodii</i>            | obligate    | 1   | 32          | clonal     | aquatic     | aquatic     | Hallmann 2011                                         |
| <i>Eudorina unicocca</i>           | obligate    | 1   | 32          | clonal     | aquatic     | aquatic     | Yamada <i>et al.</i> 2008, Hallmann 2011              |
| <i>Farlowia mollis</i>             | obligate    | 7   | 3162277660  | clonal     | aquatic     | aquatic     | Abbott 1962, Graham 1985                              |
| <i>Fonticula alba</i>              | facultative | 2   |             | non-clonal | terrestrial | terrestrial | Brown <i>et al.</i> 2009                              |
| <i>Fucus vesiculosus</i>           | obligate    | 7   | 3.16E+12    | clonal     | aquatic     | aquatic     | McCully 1966, Charrier <i>et al.</i> 2007             |
| <i>Fuirena ciliaris</i>            | obligate    | 44  | 25118864320 | clonal     | terrestrial | aquatic     | Govindarajalu 1969, Graham 1985                       |
| <i>Funaria hygrometrica</i>        | obligate    | 20  | 251188643.2 | clonal     | terrestrial | aquatic     | Puri 1981, Nishiyama 2007                             |
| <i>Gloeophycus koreanum</i>        | obligate    | 12  | 63095734450 | clonal     | aquatic     | aquatic     | Lee & Yoo 1979, Graham 1985                           |
| <i>Gonium multicocum</i>           | obligate    | 1   | 32          | clonal     | aquatic     | aquatic     | Hallmann 2011                                         |
| <i>Gonium octonarium</i>           | obligate    | 1   | 32          | clonal     | aquatic     | aquatic     | Hallmann 2011                                         |
| <i>Gonium pectorale</i>            | obligate    | 1   | 16          | clonal     | aquatic     | aquatic     | Hallmann 2011, Herron & Michod 2008, Stein 1959       |
| <i>Gonium quadratum</i>            | obligate    | 1   | 16          | clonal     | aquatic     | aquatic     | Hallmann 2011                                         |
| <i>Gonium viridistellatum</i>      | obligate    | 1   | 16          | clonal     | aquatic     | aquatic     | Hallmann 2011                                         |
| <i>Gymnoascus reessii</i>          | obligate    | 5   | 15848.93192 | clonal     | terrestrial | terrestrial | Gaetano 1986, Graham 1985                             |
| <i>Halymenia asymmetrica</i>       | obligate    | 13  | 63095734450 | clonal     | aquatic     | aquatic     | Gaetano 1986, Graham 1985                             |
| <i>Haplospora globosa</i>          | obligate    | 4   | 25118864320 | clonal     | aquatic     | aquatic     | Kuhlenkamp & Muller 1985, Charrier <i>et al.</i> 2007 |
| <i>Helminthostachys zeylandica</i> | obligate    | 5   | 70794578.44 | clonal     | terrestrial | aquatic     | Lang 1902, Graham 1985                                |
| <i>Heteroralsia saxicola</i>       | obligate    | 9   | 794328234.7 | clonal     | aquatic     | aquatic     | Kawai 1989, Charrier <i>et al.</i> 2007               |
| <i>Himantothallus grandifolius</i> | obligate    | 14  | 1.58E+12    | clonal     | aquatic     | aquatic     | Wiencke & Clayton 1990, Charrier <i>et al.</i> 2007   |
| <i>Hirudo medicinalis</i>          | obligate    | 26  | 19952623150 | clonal     | NA          | aquatic     | Mann 1962                                             |
| <i>Homo sapiens</i>                | obligate    | 200 | 1.00E+14    | clonal     | terrestrial | aquatic     | Valentine <i>et al.</i> 1994                          |
| <i>Hummia onusta</i>               | obligate    | 5   | 100000000   | clonal     | aquatic     | aquatic     | Fiore 1977, Charrier <i>et al.</i> 2007               |
| <i>Hydra attenuata</i>             | obligate    | 15  | 63095.73445 | clonal     | aquatic     | aquatic     | Campbell & Bode 1983, Glauber <i>et al.</i> 2010      |

|                                    |             |     |             |        |             |             |                                                                                  |
|------------------------------------|-------------|-----|-------------|--------|-------------|-------------|----------------------------------------------------------------------------------|
| <i>Hymenophyllum tunbridgensis</i> | obligate    | 15  | 7079457844  | clonal | terrestrial | aquatic     | Boodle 1900, Graham 1985                                                         |
| <i>Isthmoploea sphaerophora</i>    | obligate    | 3   | 15848.932   | clonal | aquatic     | aquatic     | Rueness 1974, Charrier <i>et al.</i> 2007                                        |
| <i>Kurogiella saxatilis</i>        | obligate    | 7   | 25118864320 | clonal | aquatic     | aquatic     | Kawai 1993, Charrier <i>et al.</i> 2007                                          |
| <i>Laminaria dentigera</i>         | obligate    | 14  | 1.26E+11    | clonal | aquatic     | aquatic     | Kain 1979, Charrier <i>et al.</i> 2007                                           |
| <i>Leathesia difformis</i>         | obligate    | 6   | 39810717060 | clonal | aquatic     | aquatic     | Bold & Wynne 1978, Charrier <i>et al.</i> 2007                                   |
| <i>Lemna minor</i>                 | obligate    | 18  | 794328.2347 | clonal | terrestrial | aquatic     | Daubs 1965, Graham 1985                                                          |
| <i>Lomandra hermaphroditicum</i>   | obligate    | 36  | 35481338920 | clonal | terrestrial | aquatic     | Fahn 1954, Graham 1985                                                           |
| <i>Lumbricus terrestris</i>        | obligate    | 57  | 10000000000 | clonal | terrestrial | aquatic     | Stephenson 1930                                                                  |
| <i>Mamillaria elongata</i>         | obligate    | 27  | 63095734450 | clonal | terrestrial | aquatic     | Darbishire 1904                                                                  |
| <i>Membranoptera subtropica</i>    | obligate    | 12  | 6309573.445 | clonal | aquatic     | aquatic     | Schneider & Eisemann 1979, Graham 1985                                           |
| <i>Monoclea forsteri</i>           | obligate    | 13  | 3162277.66  | clonal | terrestrial | aquatic     | Shuster 1984, Nishiyama 2007                                                     |
| <i>Morone saxatilis</i>            | obligate    | 122 | 2.51E+11    | clonal | aquatic     | aquatic     | Groman 1982                                                                      |
| <i>Mus musculus</i>                | obligate    | 102 | 2.00E+11    | clonal | terrestrial | aquatic     | Gude <i>et al.</i> 1982                                                          |
| <i>Nais variabilis</i>             | obligate    | 13  | 251188.6432 | clonal | NA          | aquatic     | Stephenson 1908                                                                  |
| <i>Neodilsea natashae</i>          | obligate    | 12  | 19952623150 | clonal | aquatic     | aquatic     | Linstrom 1984, Graham 1985                                                       |
| <i>Ophioglossum palmatum</i>       | obligate    | 14  | 6309573445  | clonal | terrestrial | aquatic     | Chrysler 1941, Graham 1985                                                       |
| <i>Pandorina colemaniae</i>        | obligate    | 1   | 16          | clonal | aquatic     | aquatic     | Bold & Wynne 1985, Hallmann 2011                                                 |
| <i>Pandorina morum</i>             | obligate    | 1   | 16          | clonal | aquatic     | aquatic     | Bold & Wynne 1985, Hallmann 2011                                                 |
| <i>Periplaneta americana</i>       | obligate    | 50  | 3162277660  | clonal | terrestrial | aquatic     | Smith 1968                                                                       |
| <i>Petermannia cirrhosa</i>        | obligate    | 39  | 25118864320 | clonal | terrestrial | aquatic     | Tomlinson & Ayensu 1968, Graham 1985                                             |
| <i>Physarum polycephalum</i>       | facultative | 2   | 300         | clonal | terrestrial | terrestrial | Stephenson & Stempen 1994, Baldauf & Doolittle 1996, Everhart <i>et al.</i> 2008 |
| <i>Pinus monophylla</i>            | obligate    | 30  | 10000000000 | clonal | terrestrial | aquatic     | Foster & Gifford 1974                                                            |

|                                  |             |     |             |            |             |             |                                                            |
|----------------------------------|-------------|-----|-------------|------------|-------------|-------------|------------------------------------------------------------|
| <i>Pisone remota</i>             | obligate    | 11  | 44668.35922 | clonal     | NA          | aquatic     | Akesson 1961                                               |
| <i>Platydorina caudata</i>       | obligate    | 1   | 32          | clonal     | aquatic     | aquatic     | Hallmann 2011                                              |
| <i>Pleodorina californica</i>    | obligate    | 2   | 128         | clonal     | aquatic     | aquatic     | Hallmann 2011                                              |
| <i>Pleodorina illinoisensis</i>  | obligate    | 2   | 32          | clonal     | aquatic     | aquatic     | Bonner 2004, Hallmann 2011                                 |
| <i>Pleodorina indica</i>         | obligate    | 2   | 128         | clonal     | aquatic     | aquatic     | Bonner 2004, Hallmann 2011                                 |
| <i>Pleodorina japonica</i>       | obligate    | 2   | 128         | clonal     | aquatic     | aquatic     | Hallmann 2011                                              |
| <i>Pleurobrachia</i>             | obligate    | 13  | 10000       | clonal     | aquatic     | aquatic     | Hyman 1940                                                 |
| <i>Pocheina flagellata</i>       | facultative | 2   | NA          | non-clonal | terrestrial | terrestrial | Bell & Mooers 1997, Brown <i>et al.</i> 2011               |
| <i>Pocheina rosea</i>            | facultative | 2   | NA          | non-clonal | terrestrial | terrestrial | Bell & Mooers 1997, Brown <i>et al.</i> 2011               |
| <i>Pogonatum stevensii</i>       | obligate    | 21  | 707945784.4 | clonal     | terrestrial | aquatic     | Chopra & Sharna 1958, Nishiyama 2007                       |
| <i>Polysphondylium pallidum</i>  | facultative | 2   | NA          | non-clonal | terrestrial | terrestrial | Stenhouse & Williams 1980                                  |
| <i>Polysphondylium violaceum</i> | facultative | 2   | NA          | non-clonal | terrestrial | terrestrial | Bonner 1959                                                |
| <i>Polytrichum commune</i>       | obligate    | 26  | 1000000000  | clonal     | terrestrial | aquatic     | Puri 1981, Nishiyama 2007                                  |
| <i>Pomatoceros triqueter</i>     | obligate    | 12  | 70794.578   | clonal     | NA          | aquatic     | Segrove 1941                                               |
| <i>Ralfsia verrucosa</i>         | obligate    | 8   | 630957344.5 | clonal     | aquatic     | aquatic     | Loiseaux 1968, Charrier <i>et al.</i> 2007                 |
| <i>Saccharomyces cerevisiae</i>  | facultative | 3   | NA          | clonal     | NA          | terrestrial | Ratcliff <i>et al.</i> 2011, Koschwanez <i>et al.</i> 2011 |
| <i>Sagittaria lancifolia</i>     | obligate    | 42  | 1.00E+11    | clonal     | terrestrial | aquatic     | Stant 1964, Graham 1985                                    |
| <i>Salmo gairdneri</i>           | obligate    | 116 | 2.51E+11    | clonal     | aquatic     | aquatic     | Yasutake 1983                                              |
| <i>Salpingoeca rosetta</i>       | facultative | NA  | 29          | clonal     | aquatic     | aquatic     | Fairclough <i>et al.</i> 2010, Dayel <i>et al.</i> 2011    |
| <i>Sarconema scinaoides</i>      | obligate    | 13  | 2511886432  | clonal     | aquatic     | aquatic     | Papenfuss & Edelstein 1974, Graham 1985                    |
| <i>Schimitzia hiscockiana</i>    | obligate    | 14  | 2.00E+11    | clonal     | aquatic     | aquatic     | Maggs & Guiry 1985, Graham 1985                            |
| <i>Schimmelmanna dawsonii</i>    | obligate    | 11  | 2.51E+11    | clonal     | aquatic     | aquatic     | Acleto 1972, Graham 1985                                   |

|                                 |             |    |             |            |             |             |                                                                          |
|---------------------------------|-------------|----|-------------|------------|-------------|-------------|--------------------------------------------------------------------------|
| <i>Scytosiphon lomentria</i>    | obligate    | 4  | 794328234.7 | clonal     | aquatic     | aquatic     | Clayton 1976, Charrier <i>et al.</i> 2007                                |
| <i>Selenipedium palmifolium</i> | obligate    | 35 | 12589254120 | clonal     | terrestrial | aquatic     | Rosso 1966, Graham 1985                                                  |
| <i>Sorogena stoianovitchae</i>  | facultative | 1  | 500         | non-clonal | aquatic     | terrestrial | Sugimoto & Endoh 2006, Blanton & Olive 1982, Olive & Blanton 1980        |
| <i>Sphacelaria bipinnata</i>    | obligate    | 9  | 1258925412  | clonal     | aquatic     | aquatic     | Clint 1927, Charrier <i>et al.</i> 2007                                  |
| <i>Sphaerobolus stellatus</i>   | obligate    | 9  | 1258925.412 | clonal     | terrestrial | terrestrial | Buller 1933, Knoll 2011                                                  |
| <i>Sphagnum recurvum</i>        | obligate    | 11 | 891250938.1 | clonal     | terrestrial | aquatic     | Puri 1981, Nishiyama 2007                                                |
| <i>Symphyogyna brogniarti</i>   | obligate    | 13 | 446683.5922 | clonal     | terrestrial | aquatic     | Puri 1981, Nishiyama 2007                                                |
| <i>Syngoderma phinneyi</i>      | obligate    | 6  | 199526.2315 | clonal     | aquatic     | aquatic     | Henry & Muller 1983, Charrier <i>et al.</i> 2007                         |
| <i>Tetrabaena socialis</i>      | obligate    | 1  | 4           | clonal     | aquatic     | aquatic     | Stein 1959, Herron & Michod 2008, Hallmann 2011                          |
| <i>Volvox africanus</i>         | obligate    | 2  | 8192        | clonal     | aquatic     | aquatic     | Herron & Michod 2008, Nozaki 2011, Hallmann 2011                         |
| <i>Volvox aureus</i>            | obligate    | 2  | 2048        | clonal     | aquatic     | aquatic     | Hallmann 2011                                                            |
| <i>Volvox carteri</i>           | obligate    | 2  | 2048        | clonal     | aquatic     | aquatic     | Nishii & Miller 2010, Bonner 1998, Kaiser 2001, Kirk 1999, Hallmann 2011 |
| <i>Volvox dissipatrix</i>       | obligate    | 2  | 16384       | clonal     | aquatic     | aquatic     | Herron & Michod 2008, Hallmann 2011, Herron 2014                         |
| <i>Volvox gigas</i>             | obligate    | 2  | 4096        | clonal     | aquatic     | aquatic     | Herron & Michod 2008, Hallmann 2011, Herron 2014                         |
| <i>Volvox globator</i>          | obligate    | 2  | 16384       | clonal     | aquatic     | aquatic     | Herron & Michod 2008, Hallmann 2011, Herron 2014                         |
| <i>Volvox obversus</i>          | obligate    | 2  | 2048        | clonal     | aquatic     | aquatic     | Herron & Michod 2008, Hallmann 2011, Herron 2014                         |
| <i>Volvox rousseletii</i>       | obligate    | 2  | 32768       | clonal     | aquatic     | aquatic     | Herron & Michod 2008, Hallmann 2011, Herron                              |

|                               |          |    |             |        |             |         |                                                                |
|-------------------------------|----------|----|-------------|--------|-------------|---------|----------------------------------------------------------------|
|                               |          |    |             |        |             |         | 2014                                                           |
| <i>Volvox tertius</i>         | obligate | 2  | 1024        | clonal | aquatic     | aquatic | Herron & Michod 2008, Hallmann 2011, Herron 2014               |
| <i>Volvulina boldii</i>       | obligate | 1  | 16          | clonal | aquatic     | aquatic | Herron & Michod 2008, Hallmann 2011, Herron 2014               |
| <i>Volvulina compacta</i>     | obligate | 1  | 16          | clonal | aquatic     | aquatic | Herron & Michod 2008, Hallmann 2011, Herron 2014               |
| <i>Volvulina pringsheimii</i> | obligate | 1  | 16          | clonal | aquatic     | aquatic | Herron & Michod 2008, Hallmann 2011, Herron 2014               |
| <i>Volvulina steinii</i>      | obligate | 1  | 16          | clonal | aquatic     | aquatic | Stein 1958, Hallmann 2011                                      |
| <i>Wolffia arrhiza</i>        | obligate | 5  | 10000       | clonal | terrestrial | aquatic | Luandolt 1986, Graham 1985                                     |
| <i>Wolffia microscopica</i>   | obligate | 7  | 70794.57844 | clonal | terrestrial | aquatic | Maheshwari 1954, Graham 1985                                   |
| <i>Yamadaella cenomyce</i>    | obligate | 7  | 3981071706  | clonal | aquatic     | aquatic | Abbott 1970, Graham 1985                                       |
| <i>Yamadaphycus carnosa</i>   | obligate | 11 | 1000000000  | clonal | aquatic     | aquatic | Mikami 1973, Graham 1985                                       |
| <i>Yamagishiella unicocca</i> | obligate | 1  | 32          | clonal | aquatic     | aquatic | Yamada <i>et al.</i> 2008, Herron & Michod 2008, Hallmann 2011 |
| <i>Zeacarpa leiomorpha</i>    | obligate | 8  | 7943282347  | clonal | aquatic     | aquatic | Anderson <i>et al.</i> 1988, Charrier <i>et al.</i> 2007       |
| <i>Zoothamnium alterans</i>   | obligate | 4  | 141.2537545 | clonal | aquatic     | aquatic | Summers 1938, Faure-Fremiet 1930                               |
